# Supplementary material for: Acute supplementation with a curcuminoid-based formulation fails to enhance resting or exercise-induced NRF2 activity in males and females
Source: Royal Society of Chemistry journal article supplement (doi:10.1039/d4fo02681k), 2024-01-01

## **Acute supplementation with a curcuminoid-based formulation fails to enhance resting or exercise-induced NRF2 activity in males and females**

Josh Thorley<sup>1</sup>., Abrar Alhebshi<sup>1,2</sup>., Ana Rodriguez-Mateos<sup>3</sup>., Zicheng Zhang<sup>3</sup>., Stephen J. Bailey<sup>1</sup>., Neil R.W Martin<sup>1</sup>., Nicolette C. Bishop<sup>1</sup>., Tom Clifford<sup>1</sup>

<sup>1</sup> School of Sport, Exercise and Health Sciences, Loughborough University, Loughborough, UK, LE11 3TU.

<sup>2</sup> Department of Clinical Nutrition, Faculty of Applied Medical Sciences, Umm Al-Qura University, Makkah, KSA.

<sup>3</sup> Department of Nutritional Sciences, School of Life Course and Population Sciences, King's College London, London, UK.

**Table S1.** Energy breakdown and antioxidant content of control meal

|                                 | <b>Control meal</b>                     |                                                                      |                                             |              |
|---------------------------------|-----------------------------------------|----------------------------------------------------------------------|---------------------------------------------|--------------|
|                                 | <b>Cadburys™<br/>Milk<br/>Chocolate</b> | <b>Nature Valley™<br/>Crunchy<br/>Granola Oats<br/>and Honey bar</b> | <b>Gatorade™<br/>Sport Orange<br/>drink</b> |              |
| Serving·d <sup>-1</sup>         | 53 g                                    | 30 g                                                                 | 400 mL                                      |              |
|                                 |                                         |                                                                      |                                             | <b>Total</b> |
| Total energy (kcal)             | 283                                     | 140                                                                  | 96                                          | 519          |
| Carbohydrates (g)               | 30                                      | 19.3                                                                 | 24                                          | 73.3         |
| Fat (g)                         | 16                                      | 5.4                                                                  | 0                                           | 21.4         |
| Protein (g)                     | 3.9                                     | 2.6                                                                  | 0                                           | 6.5          |
| Antioxidant content (mmol/100g) | 1.95                                    | 0.83                                                                 | 0                                           | 2.8          |

**Figure S1:** Chromatographs for (in order; top-bottom) bisdemethoxycurcumin, curcumin, curcumin glucuronide, curcumin sulfate, and desmethoxycurcumin from standard sample.

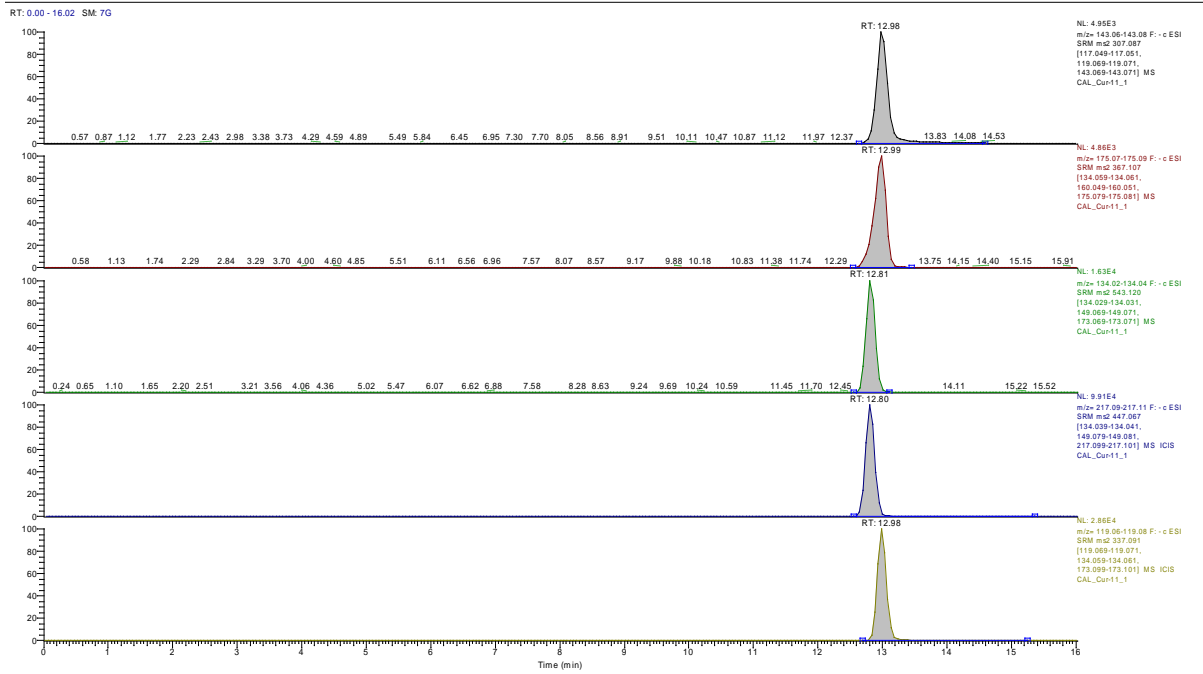

**Figure S2:** Chromatographs for (in order; top-bottom) bisdemethoxycurcumin, curcumin, curcumin glucuronide, curcumin sulfate, and desmethoxycurcumin from 1 of 2 randomised samples from CUR+EX group.

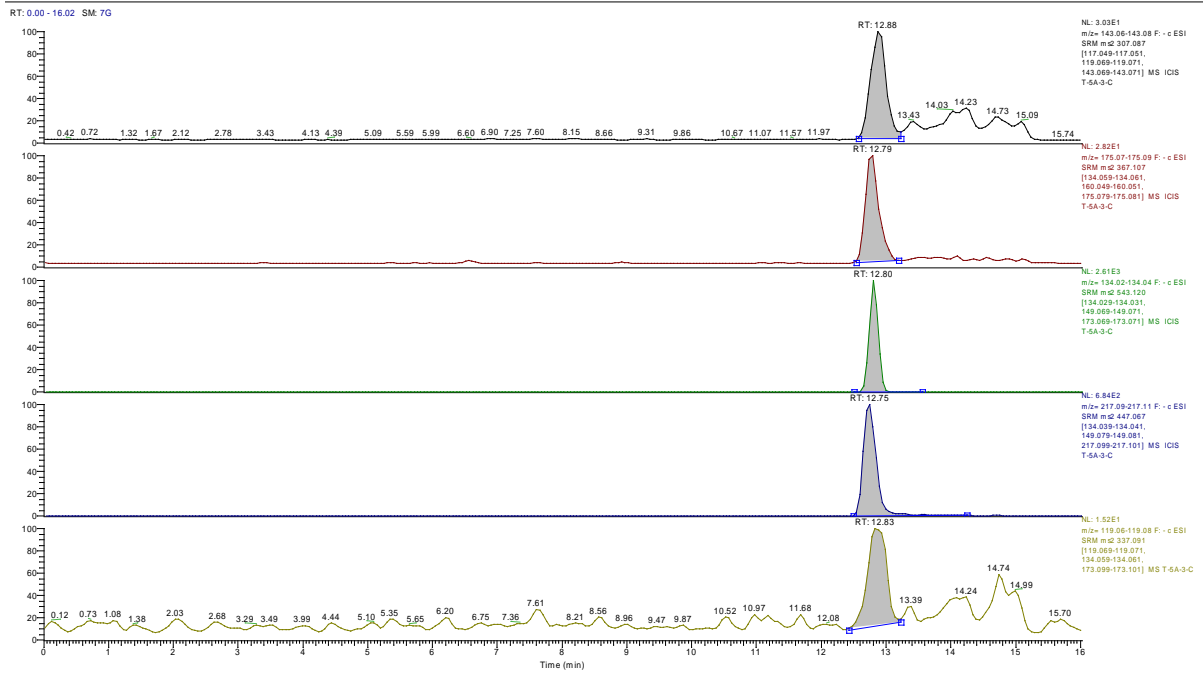

**Figure S3:** Chromatographs for (in order; top-bottom) bisdemethoxycurcumin, curcumin, curcumin glucuronide, curcumin sulfate, and desmethoxycurcumin from second randomised sample from CUR+EX group.

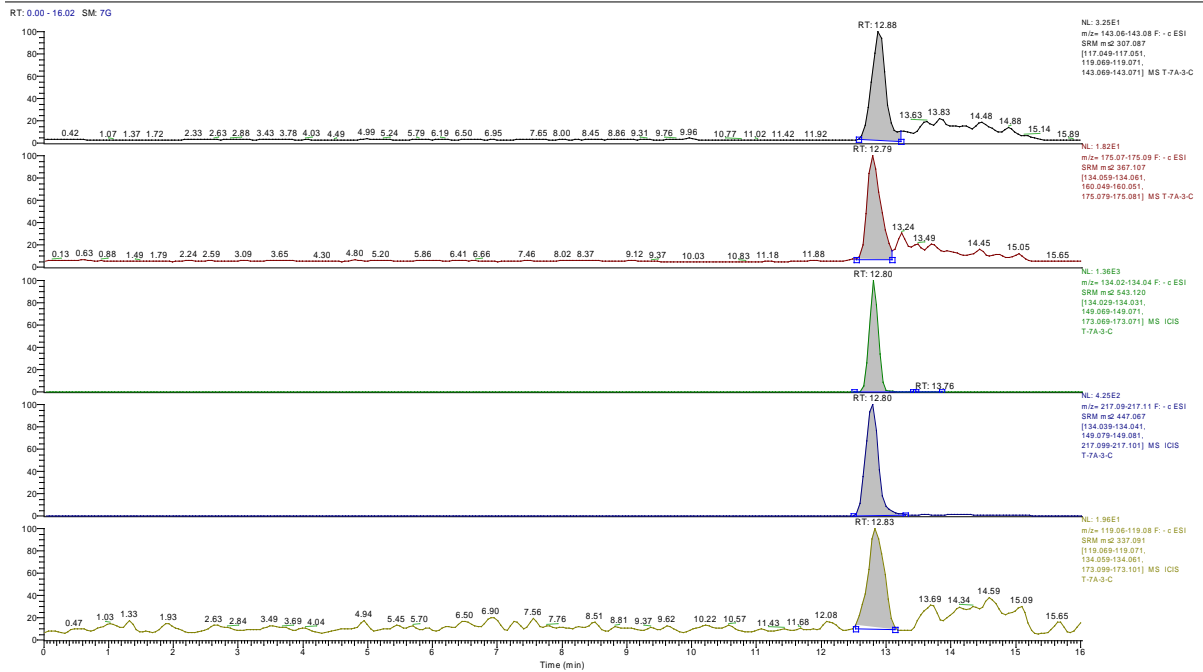

Supplement: d4fo02681k1.pdf [file d4fo02681k1.pdf]
